# Supplementary material for: Monodisperse lanthanide oxyfluorides LnOF (Ln = Y, La, Pr–Tm): morphology controlled synthesis, up-conversion luminescence and in vitro cell imaging
Source: Royal Society of Chemistry journal article supplement (doi:10.1039/c4nr00384e), 2014-01-01
Supplement: c4nr00384e1.pdf [file c4nr00384e1.pdf]

## Electronic Supplementary Information (ESI)

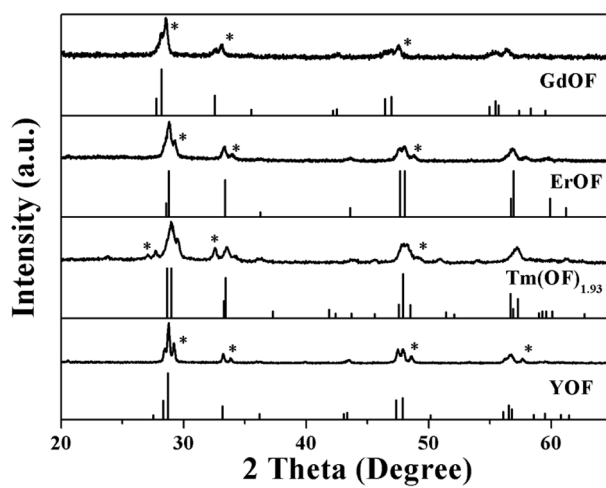

**Fig. S1** The XRD patterns of GdOF, ErOF, Tm(OH)<sub>1.93</sub> and YOF obtained after calcinations at 800 °C for 3 h and the corresponding standard data of GdOF, ErOF, Tm(OH)<sub>1.93</sub> and YOF.

**Table S1** The accurate amounts of Ln<sup>3+</sup> and F<sup>-</sup> for LaOF, GdOF, ErOF and YOF: 0.20Yb<sup>3+</sup>, 0.04Er<sup>3+</sup>, respectively.

| sample                                              | Ln <sup>3+</sup><br>(ppm)                                                      | F <sup>-</sup><br>(ppm) | atomic ratio<br>(Ln <sup>3+</sup> /F <sup>-</sup> ) |
|-----------------------------------------------------|--------------------------------------------------------------------------------|-------------------------|-----------------------------------------------------|
| LaOF                                                | 24030                                                                          | 3430                    | 173/180                                             |
| GdOF                                                | 26290                                                                          | 3101                    | 167/163                                             |
| ErOF                                                | 25590                                                                          | 3040                    | 153/160                                             |
| YOF: 0.20Yb <sup>3+</sup> ,<br>0.04Er <sup>3+</sup> | Y <sup>3+</sup> : 19390<br>Yb <sup>3+</sup> : 11640<br>Er <sup>3+</sup> : 1897 | 5701                    | 72.7/22.4/3.78/100                                  |

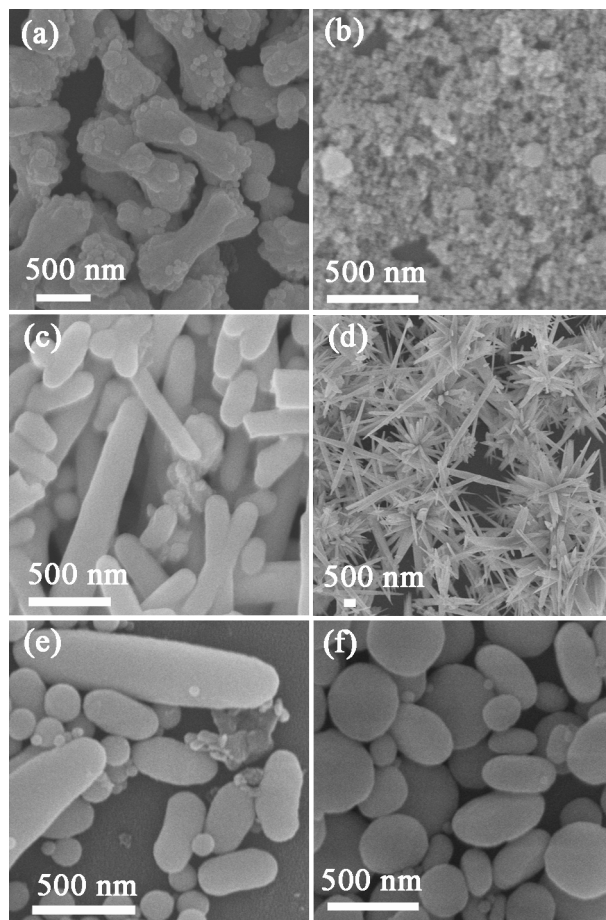

**Fig. S2** SEM images of the ErOF precursor under different experimental conditions (a) pH = 2, urea/Ln<sup>3+</sup> = 66, with LiF; (b) pH = 2, urea/Ln<sup>3+</sup> = 66, with KF; (c) pH = 6, urea/Ln<sup>3+</sup> = 66, with NaF; (d) pH = 10, urea/Ln<sup>3+</sup> = 66, with NaF; (e) pH = 2, urea/Ln<sup>3+</sup> = 80, with NaF and (f) pH = 2, urea/Ln<sup>3+</sup> = 100, with NaF.
